# Supplementary material
Source: PubMed Central journal article supplement (PMC8027961)
Supplement: NIHMS1667614-supplement-1.pdf [file NIHMS1667614-supplement-1.pdf]

## Supplemental Information Inventory

### Figures:

Figure S1 - Statistics and clustering on the zebrafish melanoma single-cell RNA-Seq data and PCA is not driven by technical aspects, Related to Figure 1.

Figure S2 - The stress-like cancer cell state is robust and not an artifact of the cell dissociation protocol, Related to Figure 2.

Figure S3 - Spatial transcriptomics analysis, immunofluorescence and protein expression of the stress-like state maker FOS protein in human sections, Related to Figure 3.

Figure S4 - FACS analysis of ZMEL-ubb-tdTomato cells, Related to Figure 4.

Figure S5 - The stress-like state is associated with drug resistance, Related to Figure 4.

### Tables:

Table S1. Cell type marker genes, Related to Figure 1.

Table S2. Transcriptional programs of the identified cancer cell states, Related to Figure 2.

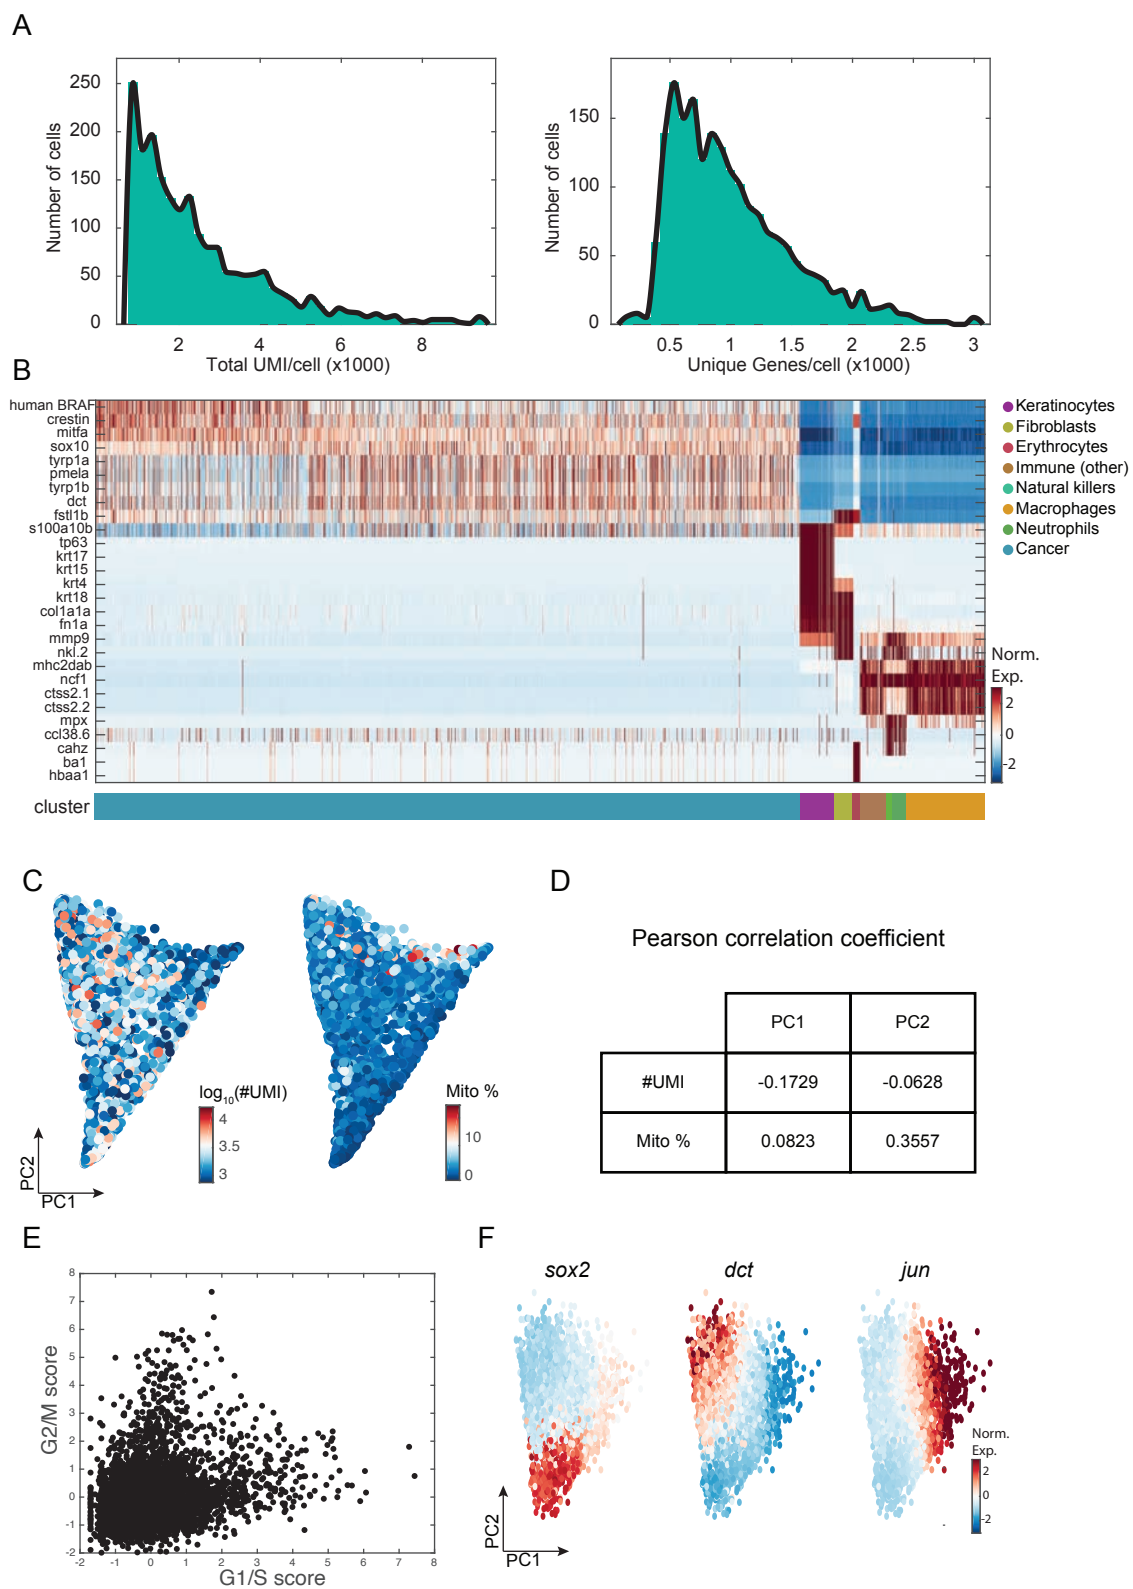

**Figure S1. Statistics and clustering on the zebrafish melanoma single-cell RNA-Seq data and PCA is not driven by technical aspects, Related to Figure 1.**

(A) Histograms of the number of UMIs (left) and genes (right) detected per cell.

(B) Heatmap of all tumor cells clustered by hierarchical clustering (see Methods), showing gene expression levels for the selected marker genes across the cell type population (Table S1). The bottom bar indicates the assigned cell type identity corresponding to Figure 1b.

(C) PCA of the cancer cells (as in Figure 1) colored by the total number of UMIs detected (left) and the fraction of the transcriptome that is accounted for by mitochondrial genes (right).

(D) Table describing Pearson correlation coefficients with PC1 and PC2 scores.

(E) Cell cycle state inferred from single-cell RNA-Seq. The x- and y- axes indicate the average expression of G1/S and G2/M genes, respectively.

(F) PCA of the malignant cells without smoothing pre-processing. Cells are colored by the smoothed expression of genes marking each of the three transcriptional programs to indicate their persistence: *sox2*, neural crest; *dct*, mature melanocyte; *jun*, stress-like.

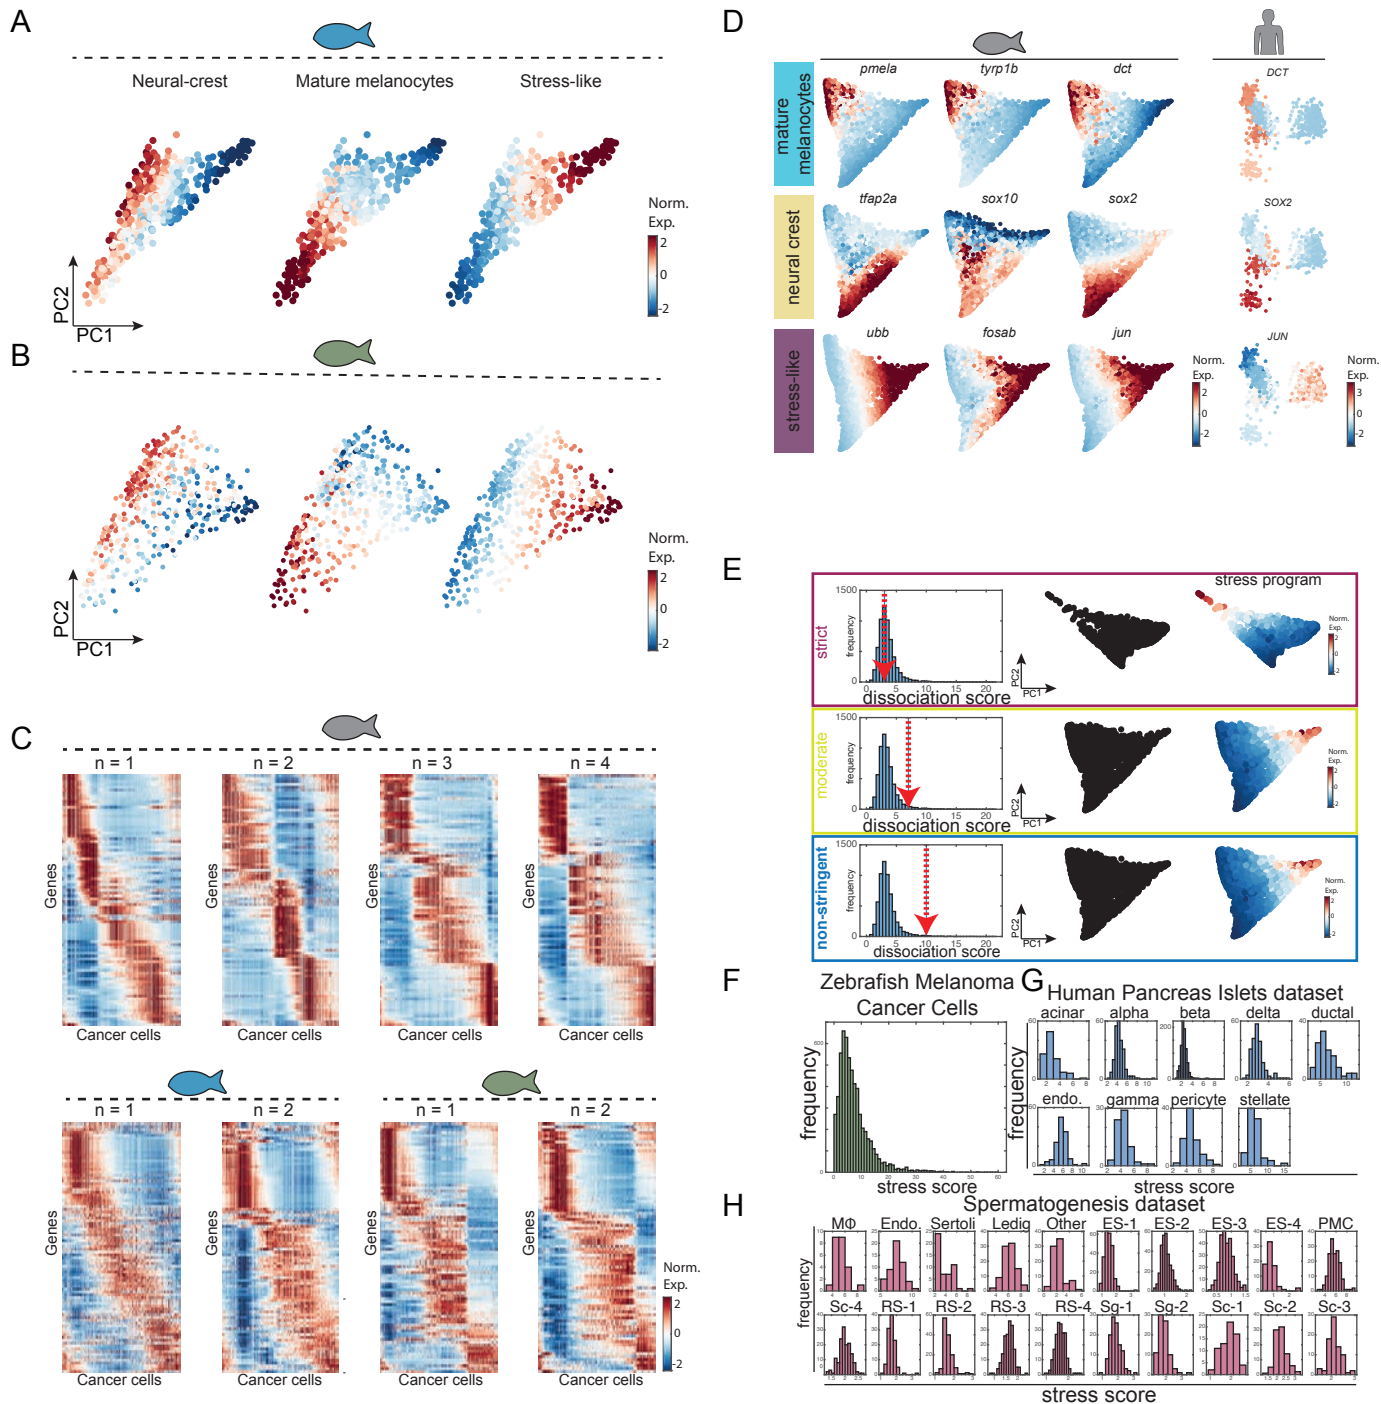

**Figure S2. The stress-like cancer cell state is robust and not an artifact of the cell dissociation protocol, Related to Figure 2.**

(A,B) Gene expression levels for the neural crest, mature melanocyte, and stress-like programs, mapped onto PC1 and PC2 on the tumor cancer cells for each biological replicate.

(C) Heatmaps showing the expression of all genes defining the neural crest, mature melanocytes and stress-like transcriptional program, for each tumor and its multiple biopsies.

(D) Gene expression levels for the indicated genes, mapped onto the PCA-space shown in Figure 1c (left three columns). The fourth column shows the expression of the indicated human genes in a PCA computed using previously reported human single-cell RNA-Seq data (Tirosh et al., 2016a).

(E) *In silico* purification based on the van den Brink et al. method. Left - Distribution of dissociation scores across all cancer cells with strict (top), moderate (middle) and non-stringent (bottom) thresholds. Middle - PCA on the remaining cancer cells after removing all cells that do not meet the dissociation score threshold. Right - The PCA plot with cells colored by the expression level of the stress-like program.

(F) Distribution of stress-like program scores, defined as the sum of expression of all genes of this program divided by the expression of all genes in a given cell, across all cancer cells.

(G,H) Same as (F) for human islets (Baron et al., 2016) and spermatogenesis (Xia et al., 2020) datasets, separated according to cell types.

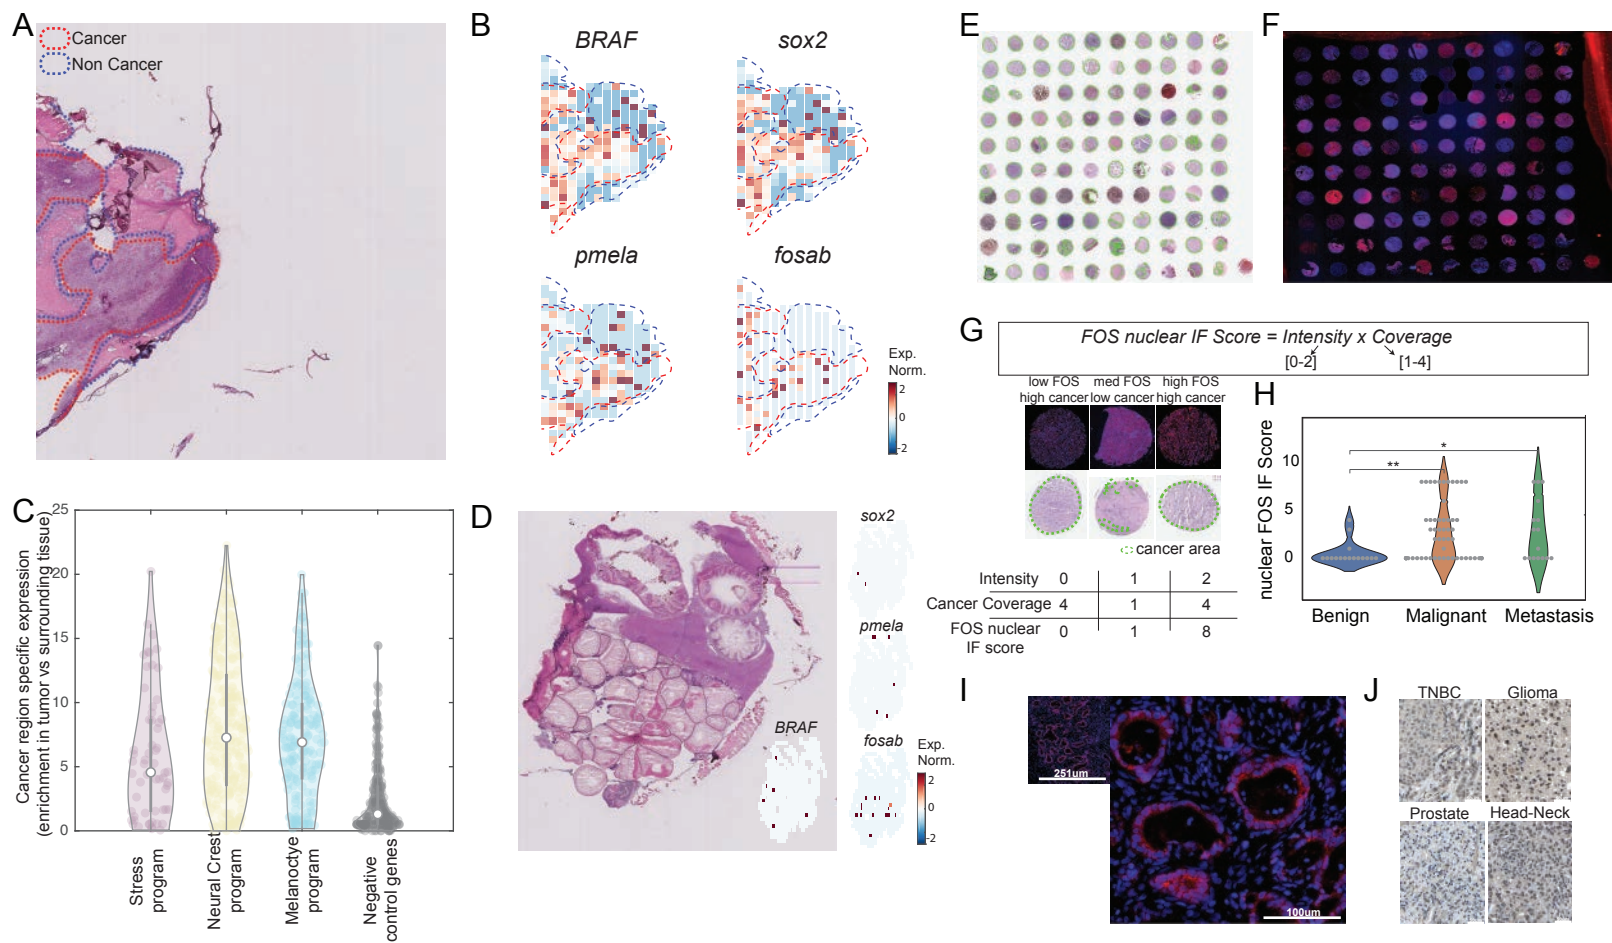

**Figure S3. Spatial transcriptomics analysis, immunofluorescence and protein expression of the stress-like state maker FOS protein in human sections, Related to Figure 3.**

(A) Hematoxylin and eosin stain of a zebrafish transplanted tumor section. Red and blue dotted lines mark cancer and non cancer areas, respectively.

(B) Gene expression profiles of the indicated genes obtained by spatial transcriptomics performed on a section adjacent to the one shown in panel A. human *BRAF*<sup>V600E</sup> transgene is a marker for the cancer region; *sox2* is a marker for the neural crest state; *pmela* is a marker for the mature melanocyte state; and *fosab* is a marker for the stress-like state.

(C) Violin plots indicating the enrichment of each gene (Man-Whitney test,  $-\log_{10}$  of the P-value) in each of the indicated programs. The negative control represents a randomly selected set of 200 genes.

(D) Hematoxylin and eosin stain of a non-tumor zebrafish section and gene expression profiles of the indicated genes obtained by spatial transcriptomics performed on an adjacent section.

(E) Hematoxylin and eosin staining of a tumor microarray containing 100 human melanoma cores (Biomax, ME1004g). Green lines indicate cancer areas.

(F) FOS immunofluorescence (red) and DAPI (blue) staining performed on the tumor microarray shown in (E).

(G) FOS immunofluorescence scoring methodology. To quantify the range and intensity of FOS staining, we computed the product of the staining intensity (0-2 scale) and coverage of cancer cells (1-4 scale), yielding an index ranging from 0 to 8. Below the immunofluorescence score, definition examples for low, medium and high FOS IF intensities are shown (see Methods).

(H) Violin plots of nuclear IF score distributions across 100 tumor microarray core sections. Shown are the distribution of FOS IF scores across the sections, indicating that malignant and metastatic sections showed higher FOS scores when compared to the benign sections;  $P < 10^{-4}$  and  $P < 10^{-2}$ , respectively.

(I) FOS immunofluorescence (red) on pancreatic ductal adenocarcinoma (PDAC) section with DAPI nuclear staining (blue).

(J) FOS immunohistochemistry images from the human protein atlas (Thul et al., 2017; Uhlén et al., 2015) for breast, glioma, prostate, and head-neck adenocarcinoma cancers.



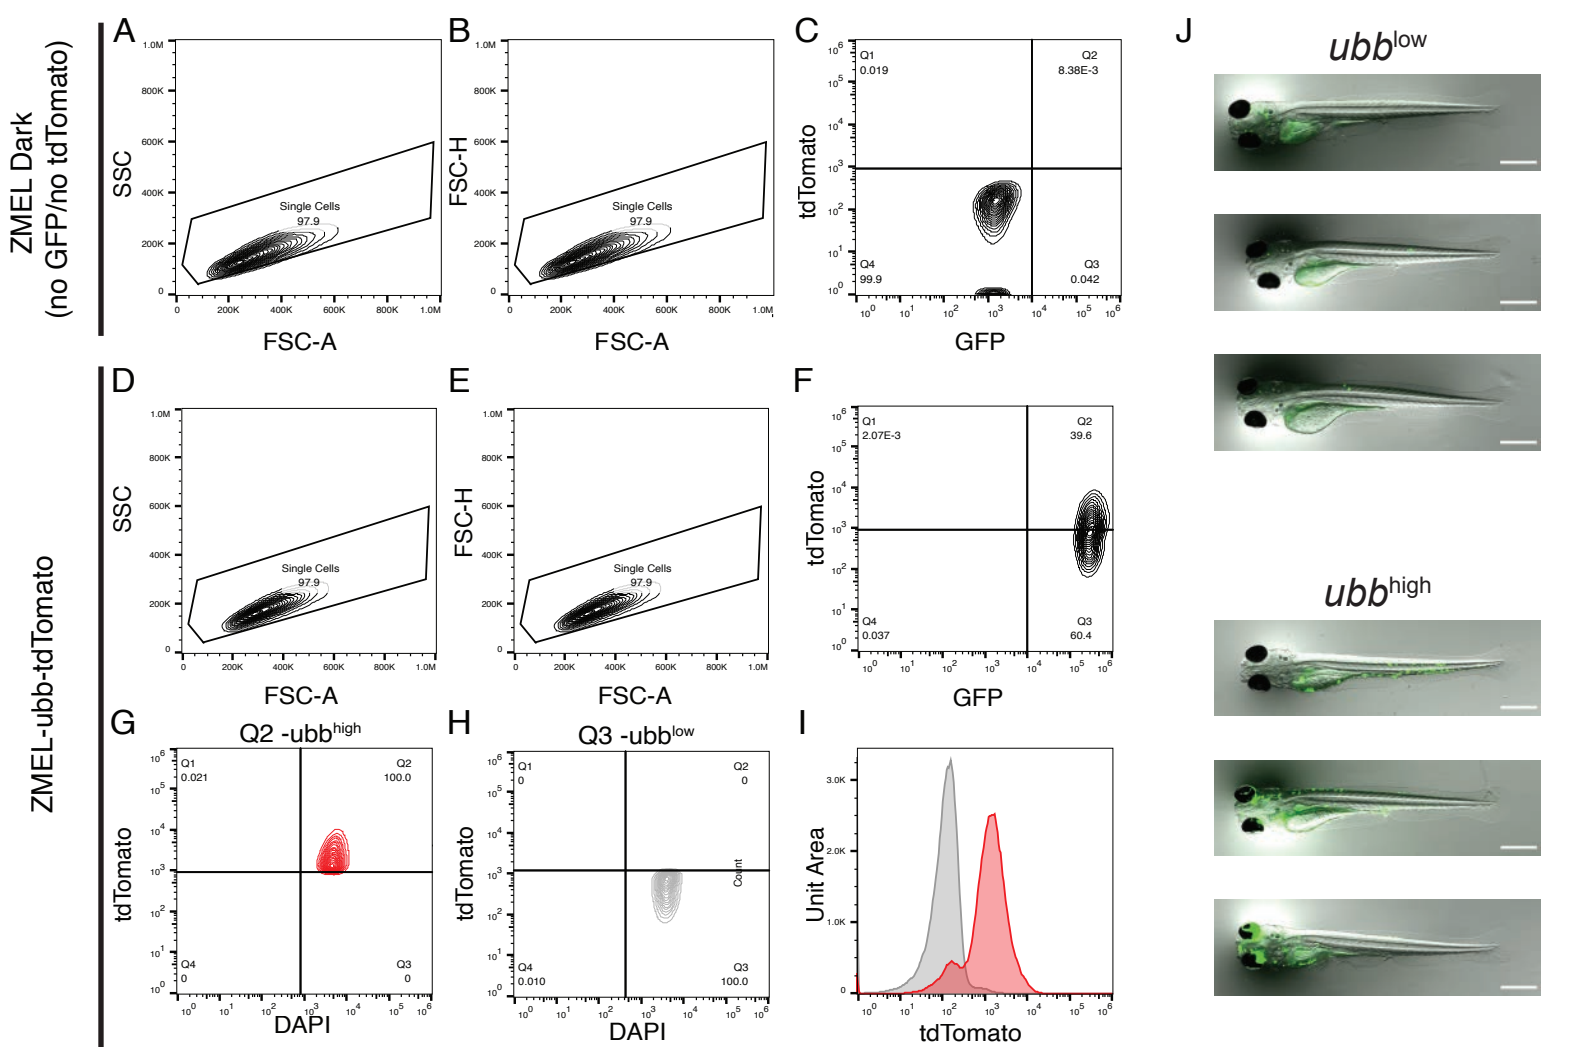

**Figure S4. FACS analysis of ZMEL-ubb-tdTomato cells, related to Figure 4.**

(A) Forward scatter vs side scatter of ZMEL cells with no GFP or tdTomato for the selection of live cells.

(B) forward scatter area vs height of the cells gated in (A) for the selection of single cells.

(C) GFP vs tdTomato intensities in logarithmic scale for cells gated in (B) to define populations.

(D-F) same as A,B,C but for ZMEL-ubb-tdTomato cell line, respectively.

(G) tdTomato intensity vs DAPI of the *ubb*<sup>high</sup> population defined by the gate Q2 in F.

(H) tdTomato intensity vs DAPI of the *ubb*<sup>low</sup> population defined by the gate Q3 in F.

(I) histograms of the populations in G and H after 6 weeks of the original sorting.

(J) Additional images of zebrafish embryos injected with ZMEL1-GFP;*ubb*-tdTomato cells. Cells sorted to low and high levels of tdTomato in panel (I) injected into zebrafish for tumor initiation assay followed by quantification of GFP intensity.

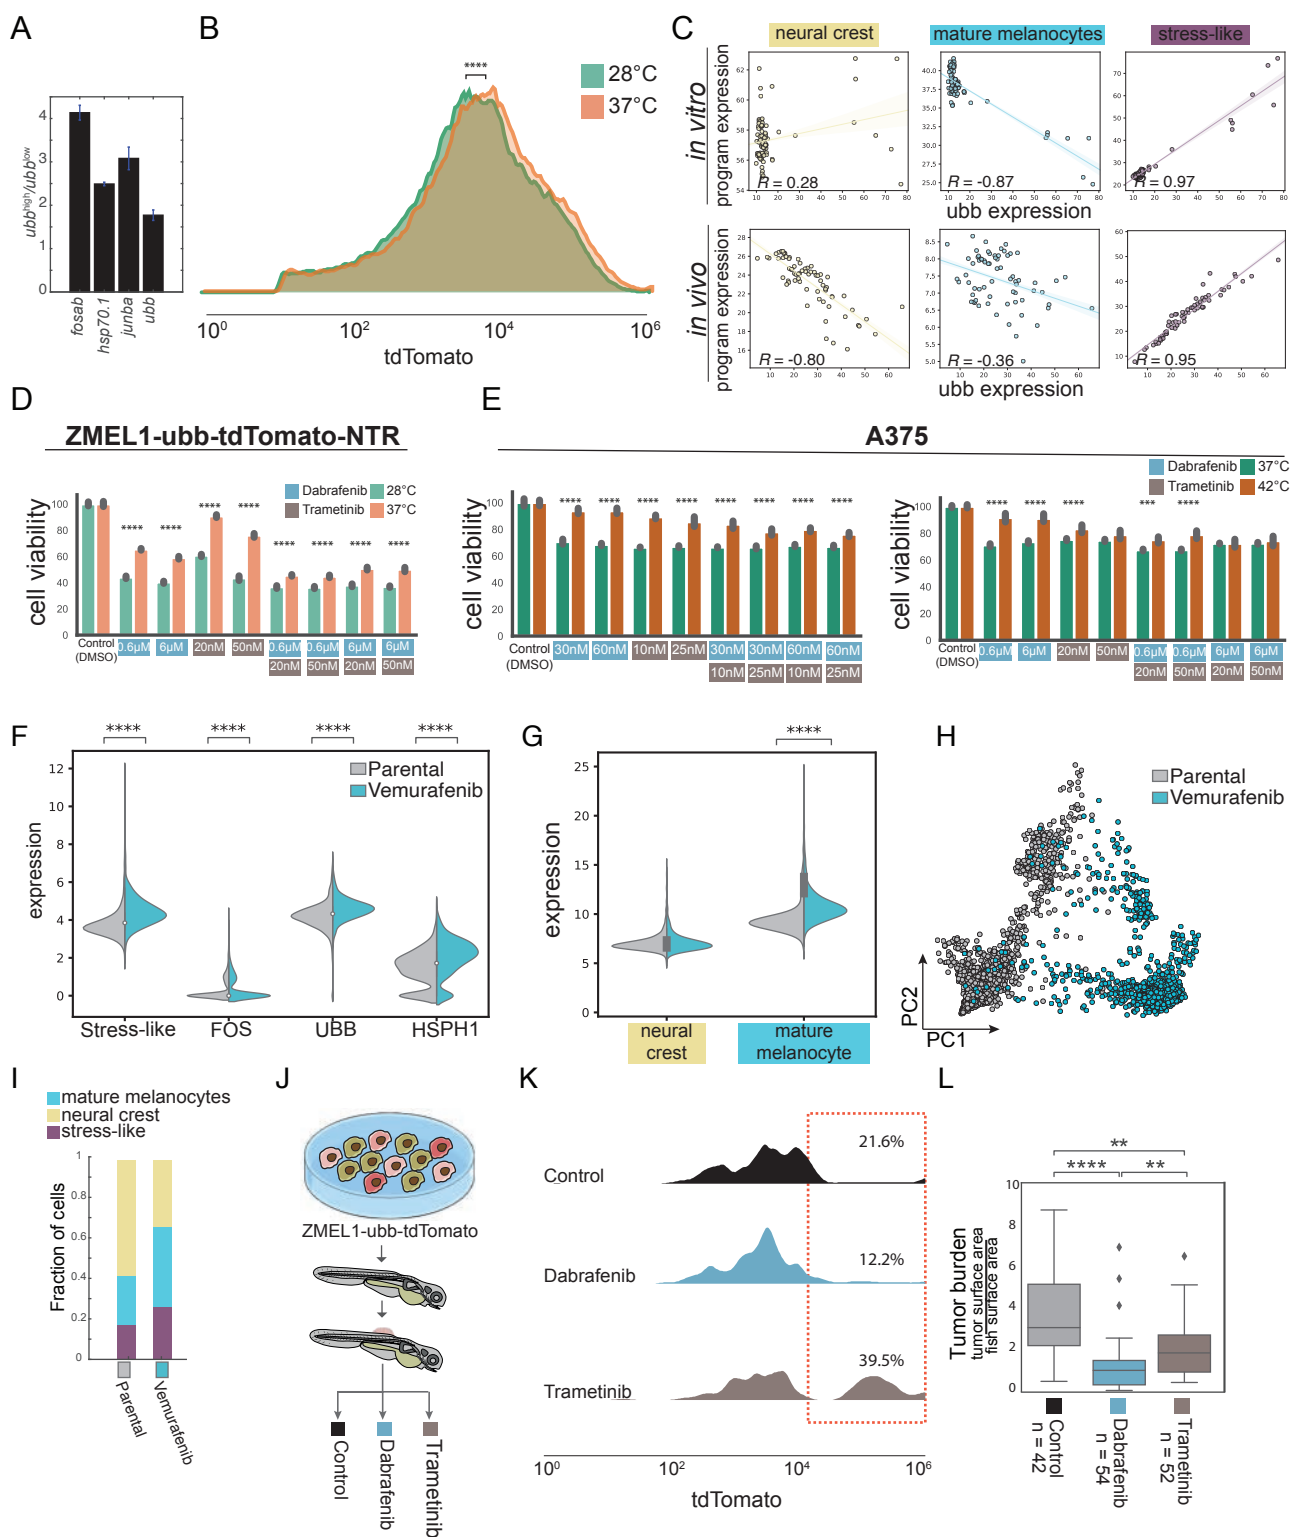

**Figure S5. The stress-like state is associated with drug resistance, related to Figure 4.**

(A) Bar plot describing the fold change in expression of the indicated genes related to the stress-like program, when comparing  $ubb^{high}$  cells to  $ubb^{low}$  cells measured by qPCR.

(B) Distributions of tdTomato intensities of 100,000 events recorded under optimal growth (green) and heat-shock (orange) conditions.

(C) Scatter plots of  $ubb$  expression vs the entire neural crest program (left), mature melanocyte program (middle) and the stress-like program (right) in ZMEL1-GFP single cells *in vitro* (top) and *in vivo* (bottom).

(D,E) ZMEL1- $ubb$ -tdTomato-NTR and A375 cell viability assays under heat shock and drug treatment, respectively. Bar plots representing cell viability across culturing conditions (optimal/heat shock).

(F,G) Violin plots for the stress-like gene program and representative genes, the neural-crest and mature melanocytes gene programs, respectively, before and after treatment with vemurafenib, a BRAF inhibitor (Ho et al., 2018) (Mann-Whitney test, \*\*\*\*,  $P < 10^{-4}$ ).

(H) PCA projection of the same cells as in (F,G). Coefficients were taken from Figure 3E. Color indicates treatment group.

(I) stacked bar plot indicating the proportions of the transcriptional cell states detected before and after treatment with BRAF inhibitor.

(J) Experimental schematic for testing if the stress-like state is associated with drug resistance *in vivo*.

(K) FACS histograms quantifying the number of  $ubb^{high}$  versus  $ubb^{low}$  cells based on tdTomato intensity.

(L) Boxplots indicating tumor burden quantified by GFP intensity of the three different treatment groups (Mann-Whitney test; \*\*\*\*,  $P < 10^{-4}$ ; \*\*,  $P < 10^{-2}$ , respectively).

**Table S1. Cell type marker genes, Related to Figure 1.**

| <b>Cell type</b> | <b>Genes</b>                                                                            |
|------------------|-----------------------------------------------------------------------------------------|
| Cancer           | <i>hBRAF, crestin, sox10, mitfa, tyrp1a, tyrp1b, dct, pmela</i> (Kaufman et al., 2016)  |
| Keratinocytes    | <i>tp63, krt4</i> (Eisenhoffer et al., 2017)                                            |
| Fibroblasts      | <i>fn1a, col1a1a, fstl1b, s100a10b</i> (Gistelinck et al., 2016; Maruyama et al., 2016) |
| Erythrocytes     | <i>ba1, hbaa1</i> (Kulkeaw and Sugiyama, 2012)                                          |
| Natural Killers  | <i>nkl.2, ccl38.6</i> (Carmona et al., 2017)                                            |
| Neutrophils      | <i>mpx, mmp9, ncf1</i> (Carmona et al., 2017)                                           |
| Macrophages      | <i>ctss2.1, ctss2,2, mhc2dab</i> (Carmona et al., 2017)                                 |

**Table S2. Transcriptional programs of the identified cancer cell states, Related to Figure 2.**

| Mature melanocytes |          | Neural crest |         |          | Stress-like |
|--------------------|----------|--------------|---------|----------|-------------|
| ACTB               | HNRNPA0  | ABCF1        | HSPA9   | SMAP1    | AHSA1       |
| ACTR1B             | HNRNPD   | ABI2         | HSPB1   | SNCG     | ATF3        |
| ALDH7A1            | HSPE1    | ACSL4        | IFI27   | SNRPB    | B2M         |
| ALDH9A1            | IFI44    | ACTN1        | IFI27L1 | SNRPD1   | BRD2        |
| ANP32A             | KARS     | ACVRL1       | IFI27L2 | SOX10    | BTG1        |
| ANXA1              | KMT5A    | ADCYAP1      | ILF2    | SOX2     | BTG2        |
| ANXA2              | KRT8     | ADD3         | ITGA5   | SPIRE1   | CCER1       |
| ANXA4              | LDHB     | AK2          | ITM2B   | SPRY4    | CCNG1       |
| ANXA5              | LMNB1    | AKAP8L       | JAK1    | SSB      | CHCHD2      |
| AP2M1              | LMNB2    | ALCAM        | JAM3    | ST8SIA6  | CIRBP       |
| AQP3               | LOXL2    | AP1B1        | KPNB1   | STAT2    | CYR61       |
| ARPC3              | LSM7     | APLP2        | LGMN    | SUMO1    | DNAJB1      |
| ARPC5              | MARCKSL1 | ARL6IP1      | LYPLA2  | SYT11    | DUSP1       |
| ARRDC3             | MDH1     | ATAD2B       | METAP1  | TBC1D10A | DUSP2       |
| ATP5B              | MDH2     | ATF4         | MITF    | TCN2     | DUSP5       |
| ATP5C1             | MIF      | ATP1B1       | MLPH    | TFAP2A   | EGR1        |
| ATP5D              | MTPN     | ATP1B3       | MOV10   | TFAP2C   | EGR2        |
| ATP5F1             | MYH7B    | ATP5A1       | MPEG1   | TFAP2E   | FOS         |
| ATP5G1             | MYL12A   | ATP5E        | MT2A    | TFRC     | FOSB        |
| ATP5O              | MYL6     | ATP5G3       | MTMR6   | TMC5     | FOSL1       |
| ATP6V0E1           | NDUFA1   | BCKDK        | MYCBP   | TMEM30A  | GADD45B     |
| BLOC1S6            | NDUFA8   | BLCAP        | MYCN    | TMEM50A  | HES1        |
| BTG3               | NPM1     | BTF3         | MYO5B   | TMEM59L  | HES4        |
| C15orf48           | PABPC1   | C6orf62      | NACA    | TP53I11  | HIST2H2AB   |
| C21orf33           | PAH      | CALM3        | NCL     | TPT1     | HSP90AA1    |
| CALM1              | PAICS    | CAPN2        | NDRG1   | TXNIP    | HSPA1L      |
| CALML3             | PALM     | CAPZA1       | NDUFA4  | U2AF2    | HSPA4       |
| CAPG               | PBDC1    | CAV1         | NDUFS5  | UQCRC1   | HSPA5       |
| CAPZB              | PCBD1    | CCND1        | NME1    | VCP      | HSPA8       |
| CCDC80             | PFN1     | CCNI         | NMRK2   | VPS26A   | HSPH1       |
| CCT3               | PFN2     | CDH1         | NPEPL1  | WBP2NL   | ID2         |
| CCT8               | PKM      | CDK15        | NSA2    | YWHAB    | ID3         |
| CD81               | PLPP1    | CDKN1B       | NTNG2   | YWHAG    | IER2        |



|          |          |          |         |        |          |
|----------|----------|----------|---------|--------|----------|
| CDC42SE1 | PMEL     | CEP170   | NTRK3   | ZBTB20 | IER5     |
| CFL1     | POMP     | CFH      | NUDC    |        | JDP2     |
| CIRBP    | POR      | CHUK     | OAZ1    |        | JUN      |
| CKAP2    | PPIA     | CIART    | OLA1    |        | JUNB     |
| CKB      | PPIB     | CLIC4    | PA2G4   |        | JUND     |
| CLU      | PPP2CB   | CNTFR    | PABPC1  |        | MCL1     |
| CNBP     | PRDX1    | COL9A2   | PABPN1  |        | MIDN     |
| COBLL1   | PRDX2    | COX6C    | PDCD6IP |        | MKNK2    |
| COPB2    | PRDX6    | CSNK2A1  | PDLIM1  |        | NFKBIA   |
| COPE     | PSMA2    | CSNK2B   | PEF1    |        | NR4A1    |
| COPS4    | PSMA3    | CSTB     | PFDN5   |        | NR4A3    |
| COX4I2   | PSMB6    | CTSH     | PGAM1   |        | PDCD4    |
| COX6B1   | PSMC3    | CTSL     | PGK1    |        | PLK3     |
| COX7A2   | PSMC5    | CTSZ     | PIK3CA  |        | PNRC2    |
| CSRP2    | PSME2    | CXXC5    | PLA2G7  |        | PPP1R15A |
| CSTB     | PSMG1    | CYC1     | PLEC    |        | RHBDD1   |
| CTSL     | PTGR1    | CYCS     | PNO1    |        | RSRP1    |
| DAD1     | QDPR     | DCBLD1   | PNOC    |        | SGK1     |
| DAP      | RAD21    | DDX21    | PPP1R1B |        | SKIL     |
| DAPL1    | RAN      | DUSP6    | PRMT1   |        | SLC38A2  |
| DBI      | RAP1B    | EDNRA    | PSAP    |        | SOX4     |
| DCT      | REEP5    | EEF1A2   | PSMB1   |        | SQSTM1   |
| DDC      | RHOC     | EEF1B2   | PTP4A2  |        | STIP1    |
| DDOST    | RPN1     | EEF1D    | PTPRE   |        | TOB1     |
| DENR     | RTN1     | EIF2S2   | PVALB   |        | UBB      |
| DYNC1LI2 | S100A10  | EIF2S3   | QKI     |        | UBC      |
| EEF1G    | S100A4   | EIF3G    | RAB5A   |        | WSB1     |
| EEF2     | SEC13    | EIF3I    | RABL6   |        | ZFAND2B  |
| EFEMP2   | SEC61B   | EIF4B    | RACK1   |        |          |
| EHD1     | SELENOF  | EIF4EBP2 | RDH8    |        |          |
| EIF4A1   | SLC25A5  | EIF5     | RGL1    |        |          |
| EIF5A2   | SLC39A10 | EIF5A    | RGS12   |        |          |
| ELOVL1   | SOD1     | EMILIN1  | RHPN2   |        |          |
| ENO1     | SPON2    | EMP3     | RNASET2 |        |          |
| ETF1     | SSR4     | ENPP1    | ROMO1   |        |          |
| FHL1     | SUB1     | FABP3    | RPL22L1 |        |          |
| FNDC5    | SYNGR3   | FAM107B  | RPLP2   |        |          |

|             |         |         |          |  |  |
|-------------|---------|---------|----------|--|--|
| FSTL1       | TCP1    | FAM126A | RPS26    |  |  |
| FXVD6-FXVD2 | TFG     | FAU     | RSL24D1  |  |  |
| GAPDHS      | TIMP2   | FGFR4   | RTN4     |  |  |
| GDI1        | TKTL2   | FNBP1L  | RUNX3    |  |  |
| GLRX        | TMA7    | GADD45A | SASH1    |  |  |
| GM2A        | TMED2   | GLO1    | SDC4     |  |  |
| GPR143      | TMEM163 | GLUL    | SDHA     |  |  |
| GPX3        | TTR     | GNB1    | SDPR     |  |  |
| GPX4        | TUBB4B  | GNG2    | SEH1L    |  |  |
| GSTP1       | TYRP1   | GNG3    | Sep9     |  |  |
| GSTT1       | UBE2L3  | GNPDA2  | SERBP1   |  |  |
| GYG1        | UFM1    | GPI     | SF3A3    |  |  |
| H2AFZ       | UQCRC2  | H1FX    | SGPL1    |  |  |
| HIGD1A      | VIM     | H2AFY2  | SH3BGRL3 |  |  |
| HINT1       | YWHAB   | HDAC1   | SH3GLB1  |  |  |
| HM13        | YWHAE   | HDLBP   | SHFM1    |  |  |
| HMGA1       | YWHAQ   | HNRNPAB | SLC20A1  |  |  |
| HMGB2       |         | HNRNPR  | SLC25A22 |  |  |
| HMG2        |         | HPS1    | SLC2A11  |  |  |
